# Supplementary material for: TiNb2O7/graphene composites as high-rate anode materials for lithium/sodium ion batteries
Source: Royal Society of Chemistry journal article supplement (doi:10.1039/c5ta10510b), 2016-01-01
Supplement: c5ta10510b1.pdf [file c5ta10510b1.pdf]

**Supplementary information**

**TiNb<sub>2</sub>O<sub>7</sub>/Graphene Composites as a High-Rate Anode Material for  
Lithium/Sodium Ion Batteries**

Shuang Li,<sup>ab</sup> Xi Cao,<sup>b</sup> Charles N Schmidt,<sup>b</sup> Qian Xu,<sup>a</sup> Evan Uchaker,<sup>b</sup> Yi Pei,<sup>b</sup> Guozhong Cao<sup>\*b</sup>

<sup>a</sup>*School of Materials Science and Metallurgy, Northeastern University, Shenyang 110819, PR China*

<sup>b</sup>*Department of Materials Science and Engineering, University of Washington, Seattle, Washington 98195, United States. E-mail: gzcao@u.washington.edu. Tel.: +1-206-616-9084. Fax: +1-206-543-3100.*

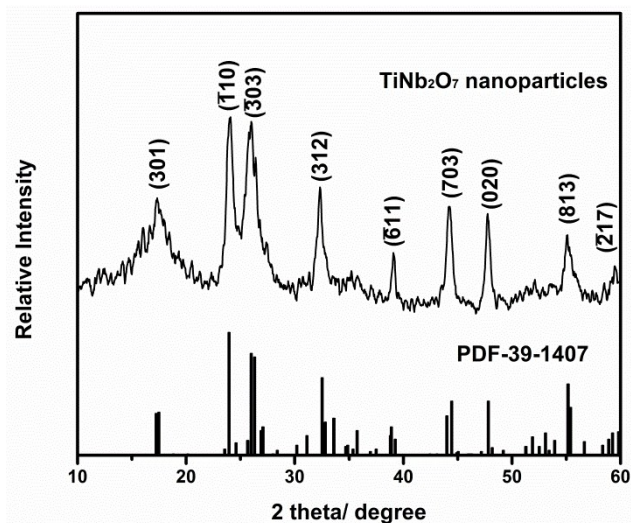

Figure S1. XRD patterns of pure TNO before freeze drying and thermal reduction. The vertical lines at the bottom correspond to the standard XRD reflections of monoclinic TiNb<sub>2</sub>O<sub>7</sub>.

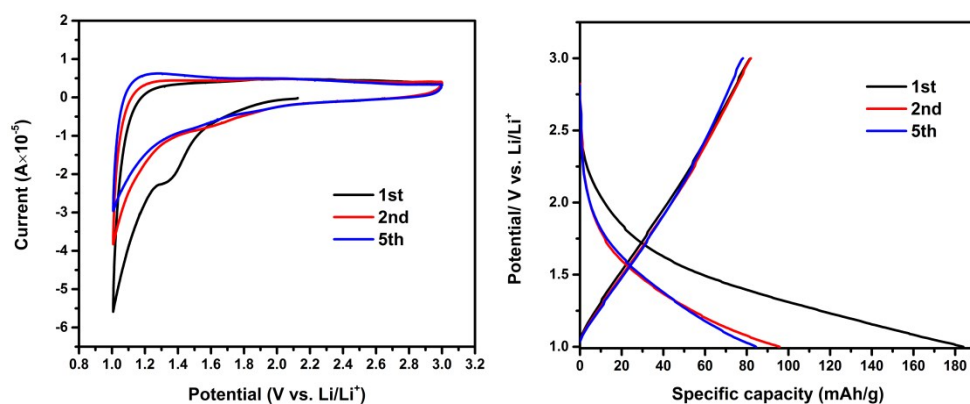

Figure S2. (a) CV curves of pure graphene electrodes at  $0.2 \text{ mV s}^{-1}$  in lithium coin cells; (b) discharge-charge profiles of pure graphene electrodes in lithium coin cells at current rate of  $0.1 \text{ C}$ .

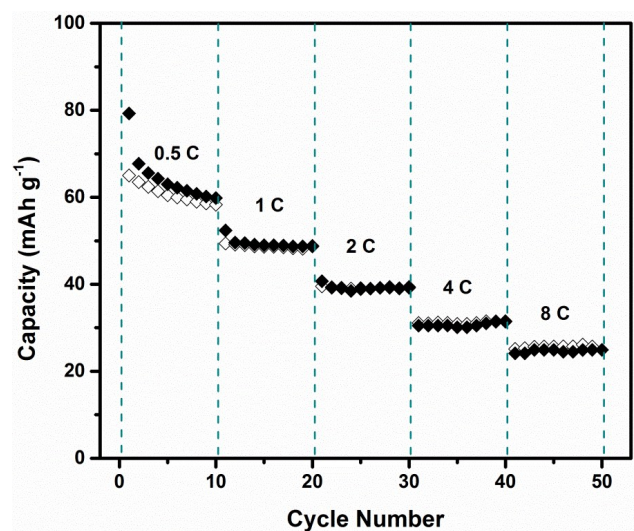

Figure S3. Rate capacities of pure graphene sheets synthesized in this work

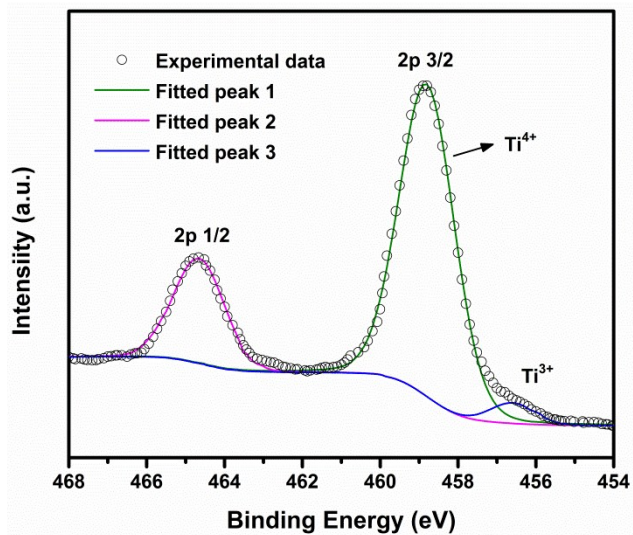

Figure S4. Ti2p XPS spectra of TNO/G composite after annealed in Ar with  $\text{Ti}^{3+}$  available.

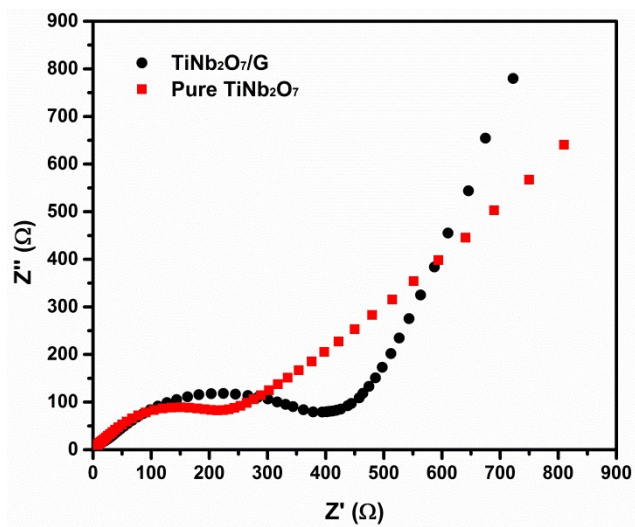

Figure S5. Nyquist plots of EIS results of TNO/G and pure TNO electrodes after 5 discharge and charge cycles.

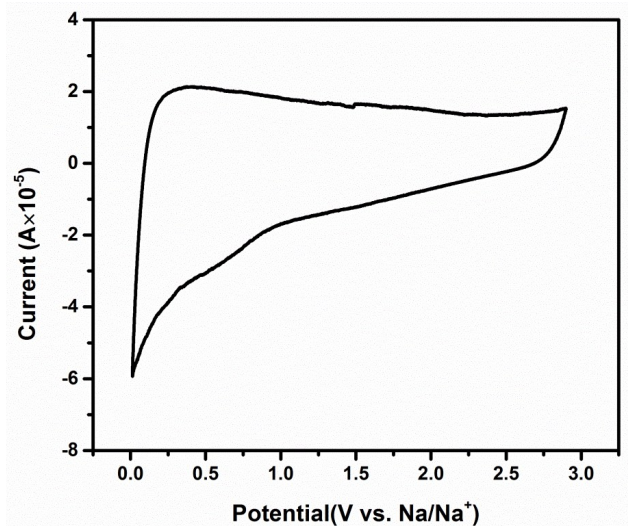

Figure S6. The 100<sup>th</sup> cycle CV curve of TNO/G composite at 0.2 mV s<sup>-1</sup>.

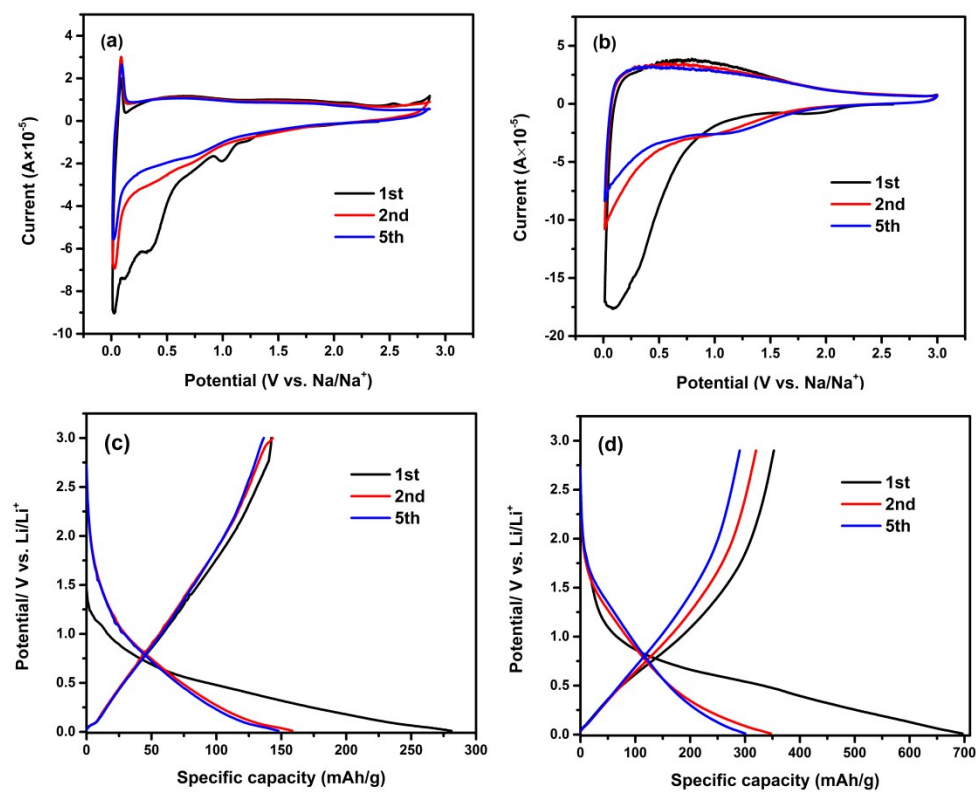

Figure S7. CV curves of (a) pure TNO and (b) pure graphene electrodes at 0.2 mV s<sup>-1</sup>; discharge-charge profiles of (c) pure TNO and (d) pure graphene electrodes in sodium coin cells at current density of 25 mA g<sup>-1</sup>.

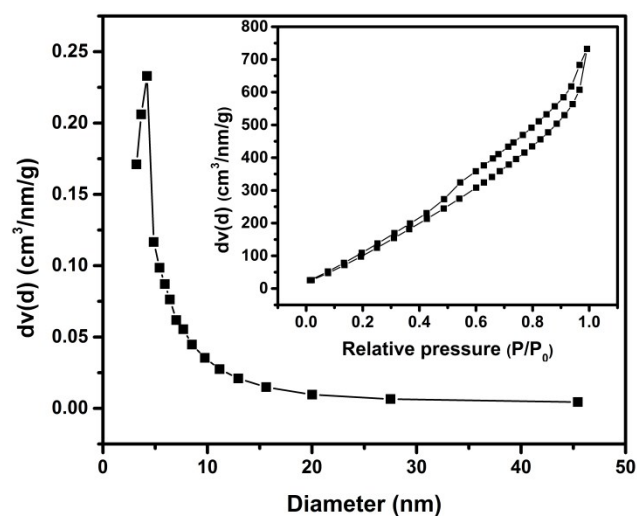

Figure S8. BJH desorption pore size distribution for the as synthesized graphene sheets (inset: N<sub>2</sub> adsorption-desorption isotherm).

Table S1. Specific capacity values of pure TNO ( $C^{TNO}$ ), graphene ( $C^G$ ) and enhanced capacities ( $C^{TNO/G}_{exp} - C^{TNO/G}_{cal}$ ) from Figure 6.

| Capacity Values<br>(mA h g <sup>-1</sup> ) | Discharge-Charge Rate (1C=387 mA g <sup>-1</sup> ) |       |       |       |       |
|--------------------------------------------|----------------------------------------------------|-------|-------|-------|-------|
|                                            | 0.5 C                                              | 1 C   | 2 C   | 4 C   | 8 C   |
| $C^{TNO}$                                  | 136.5                                              | 108.7 | 81.2  | 54.9  | 33.4  |
| $C^G$                                      | 24.3                                               | 19.5  | 15.7  | 12.5  | 10.2  |
| $C^{TNO/G}_{cal}$                          | 160.8                                              | 128.2 | 96.9  | 67.4  | 43.6  |
| $C^{TNO/G}_{exp}$                          | 201.2                                              | 186.1 | 170.6 | 154.3 | 133.9 |
| $C^{TNO/G}_{exp} - C^{TNO/G}_{cal}$        | 40.4                                               | 57.9  | 73.7  | 86.9  | 90.3  |
